# Supplementary figures and images for: Exploring Alterations in the Gut Resistome in Medically Treated Inflammatory Bowel Disease Patients
Source: Research Square preprint supplement (doi:10.21203/rs.3.rs-4354358/v1), 2024-07-29

Supplemental Figure 2

# ARO Terms (Fig A-K)


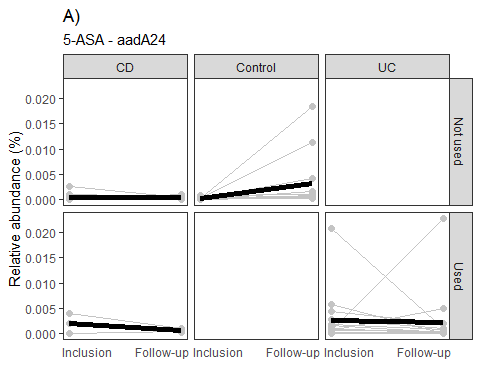

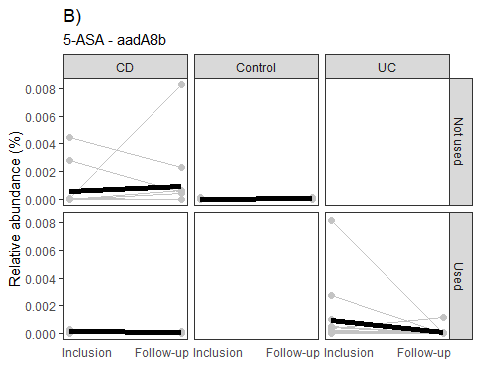

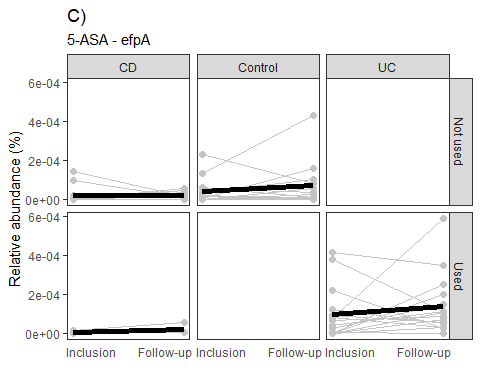

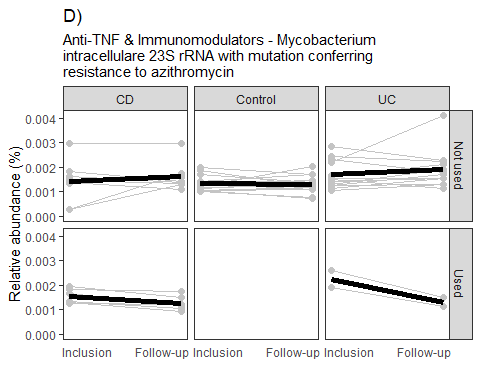

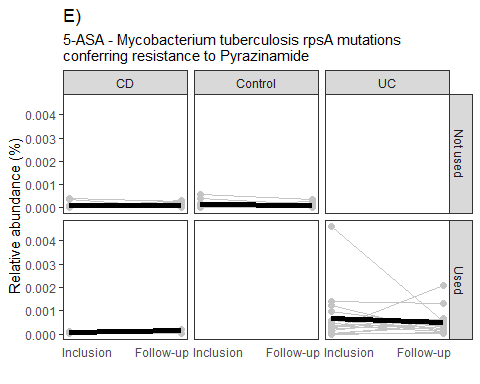

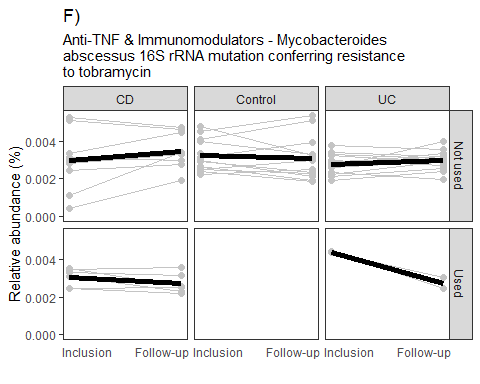

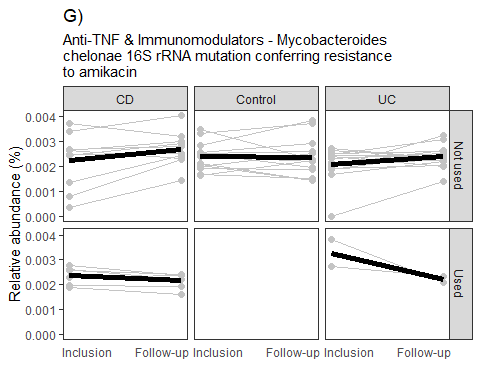

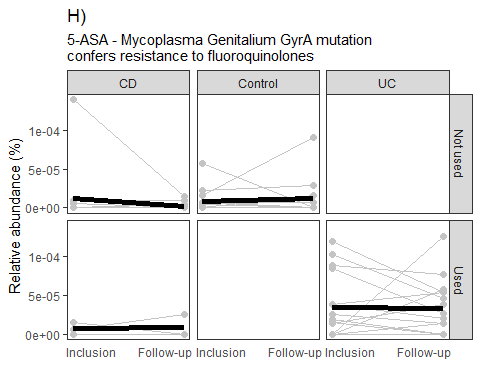

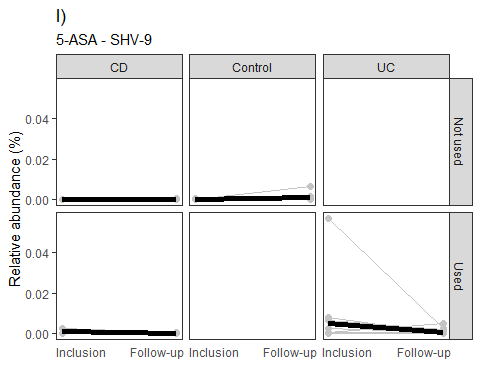

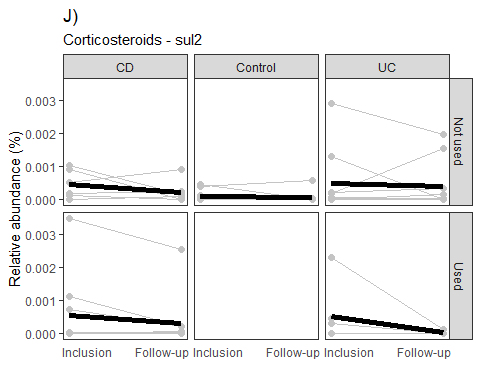

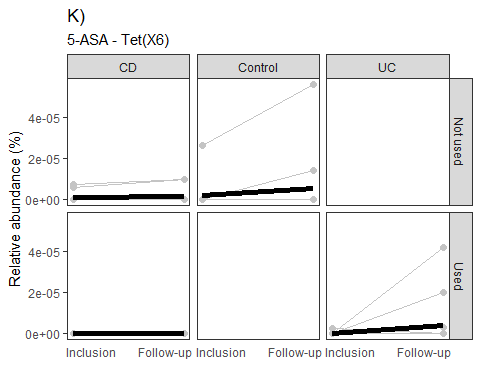


# Gene Families (Figures L-O)


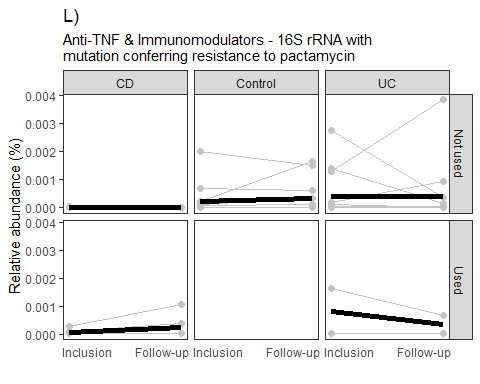

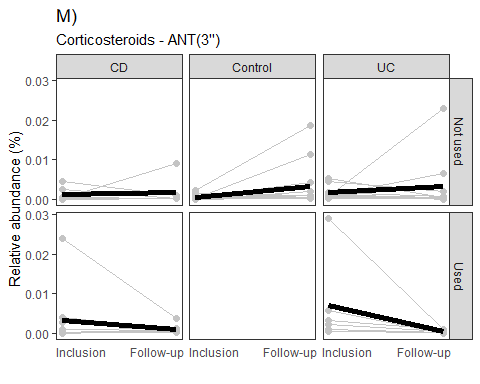

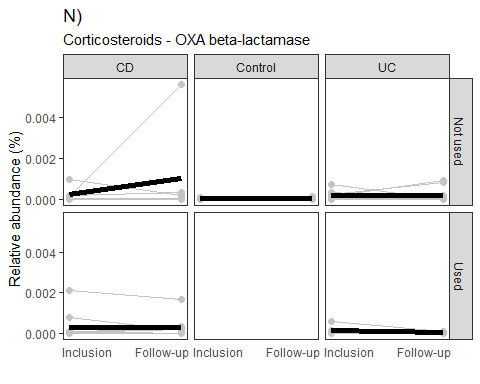

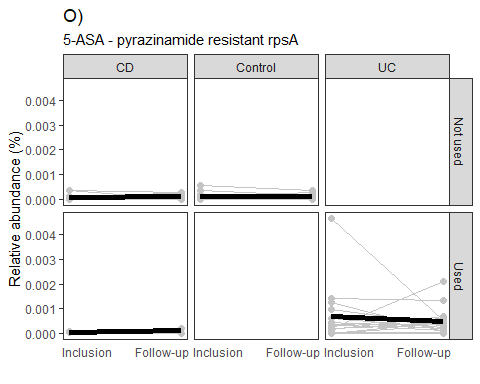


# Drug Class (Figures P-AE)


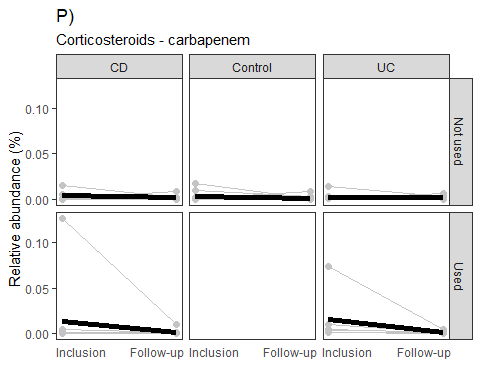

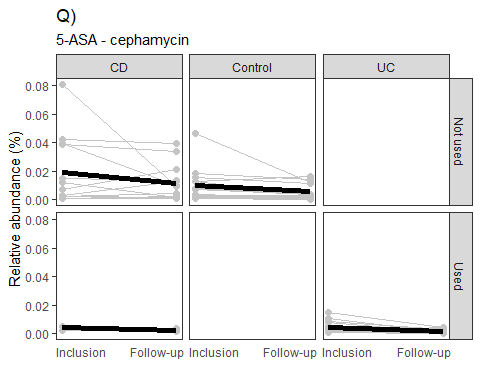

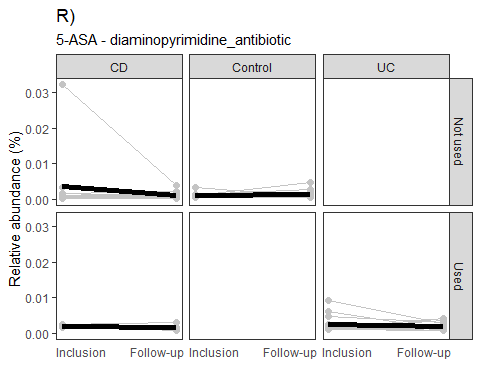

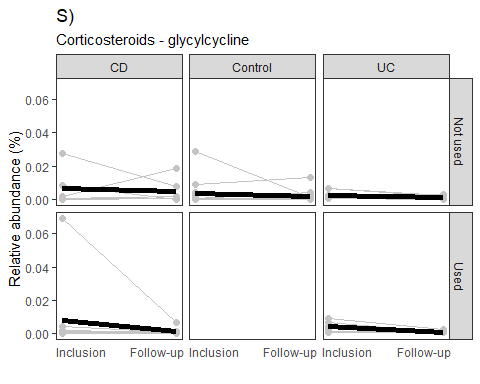

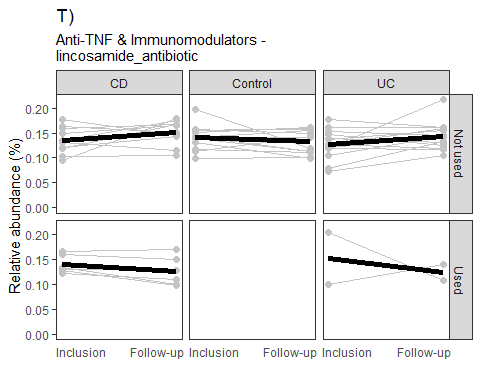

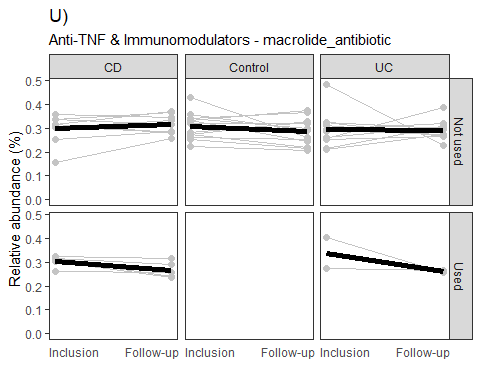

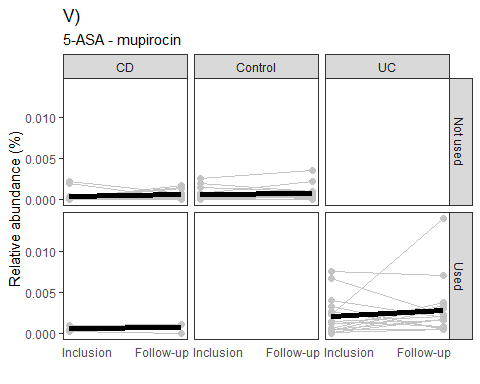

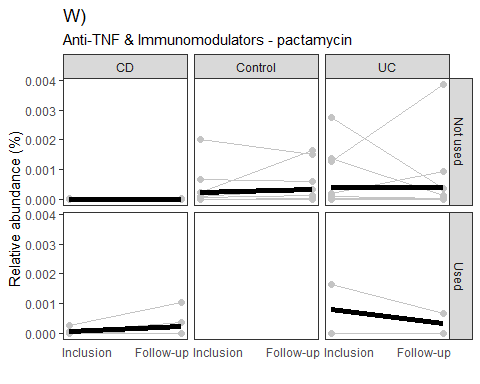

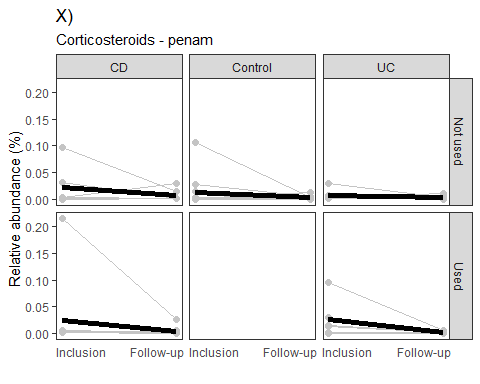

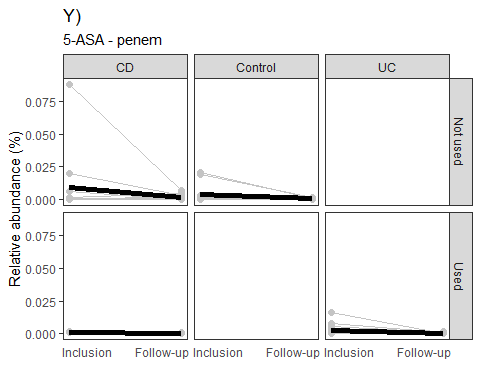

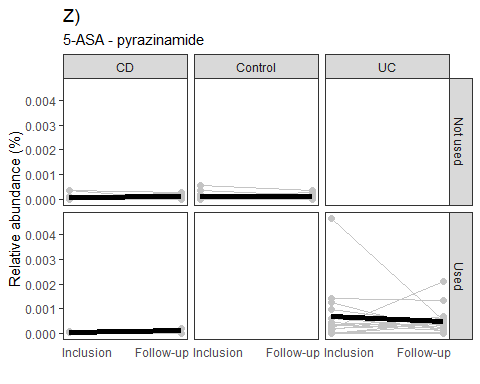

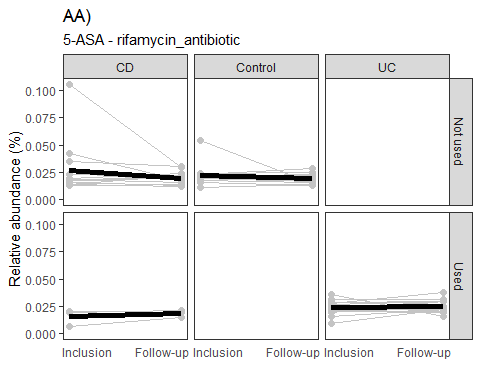

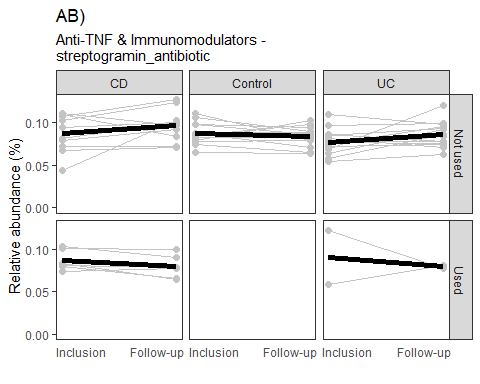

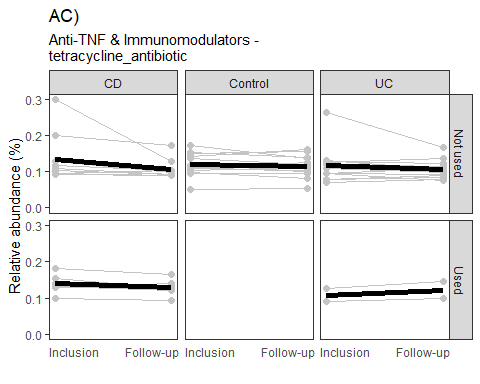

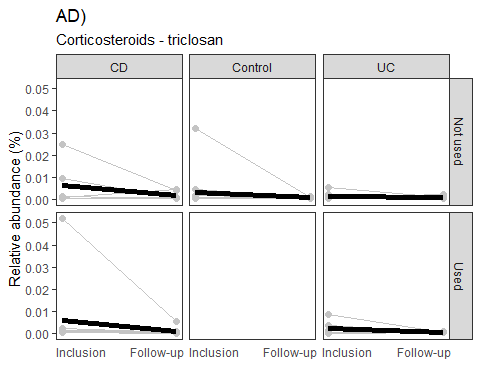

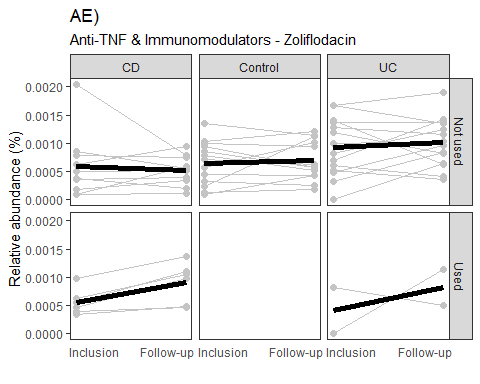

Supplement: Supplementary file 1 [file 52d5d81c3cd664c1e9617506.docx]

Supplemental Figure 3


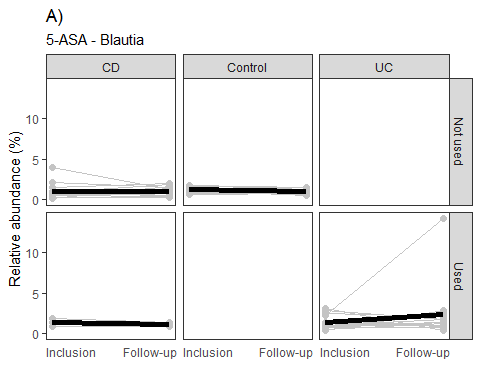

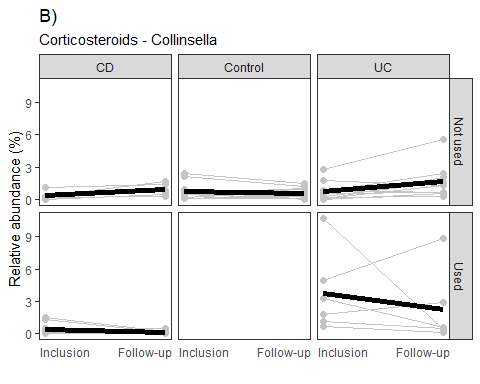

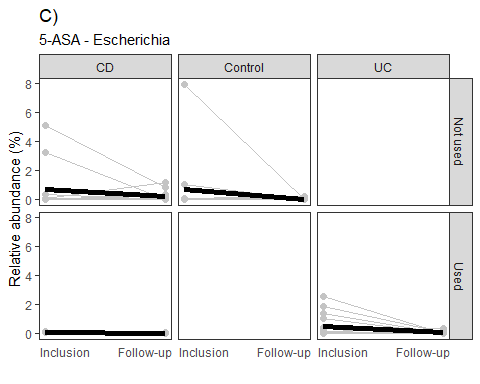

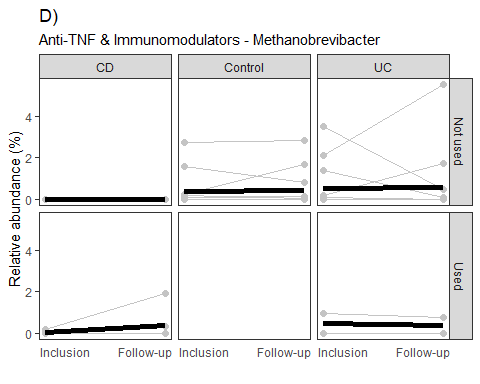

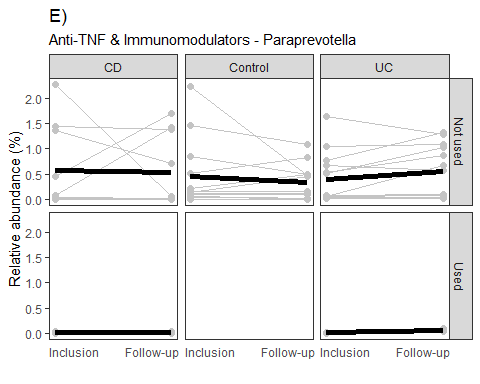

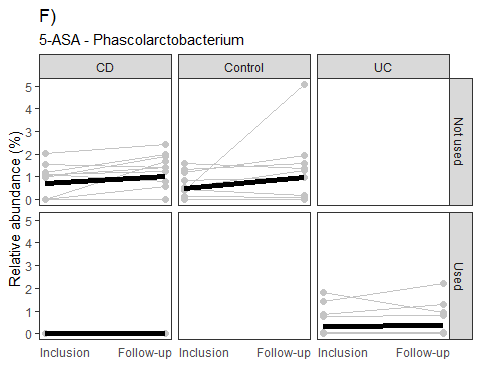

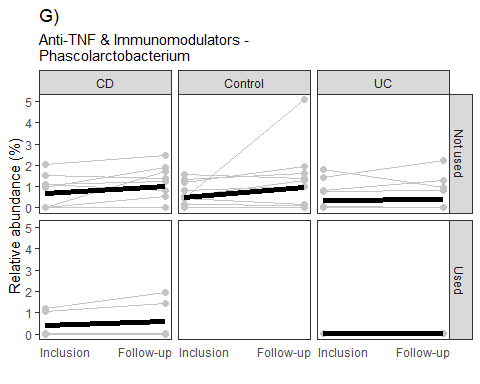

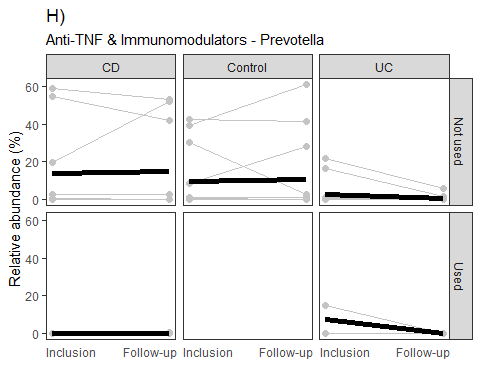

Supplement: Supplementary file 2 [file df390408aaaa346db3d5ac6e.docx]
